# Supplementary material for: Site-selective occupation, optical spectrum regulation and photoluminescence property investigation of Eu2+-activated blue light-excited yellow-orange emitting phosphors
Source: Royal Society of Chemistry journal article supplement (doi:10.1039/d3cp00456b), 2023-01-01
Supplement: d3cp00456b1.pdf [file d3cp00456b1.pdf]

## Electronic Supplementary Information (ESI)

### **Site-selective occupation, optical spectra regulation and photoluminescence properties investigation of Eu<sup>2+</sup>-activated blue light-excited yellow-orange emitting phosphors**

Wenzhi Sun <sup>a, \*</sup>, Tingting Zhao <sup>a</sup>, Shuya Wang <sup>a</sup>, Denghu Wei <sup>b</sup>, Mengmeng Jiao <sup>c</sup> and

Hongwu Zhang <sup>a, \*</sup>

<sup>a</sup> School of Chemistry and Materials Science, Ludong University, Yantai 264025, P. R. China.

<sup>b</sup> School of Materials Science and Engineering, Liaocheng University, Liaocheng 252059, P. R. China.

<sup>c</sup> School of Physics and Optoelectronic Engineering, Ludong University, Yantai 264025, P. R. China.

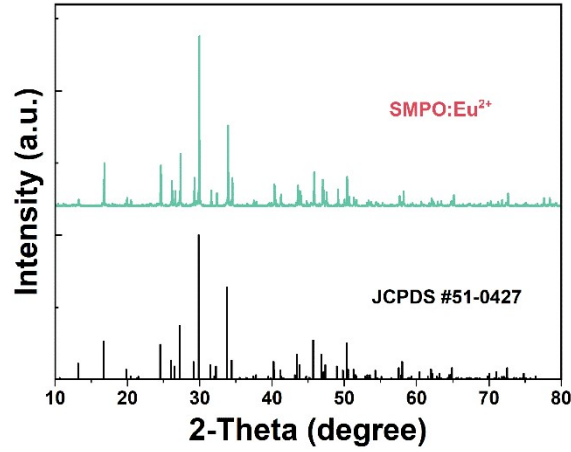

**Fig. S1** XRD pattern of SMPO:Eu<sup>2+</sup> with the standard data Sr<sub>9</sub>Fe<sub>1.5</sub>(PO<sub>4</sub>)<sub>7</sub>.

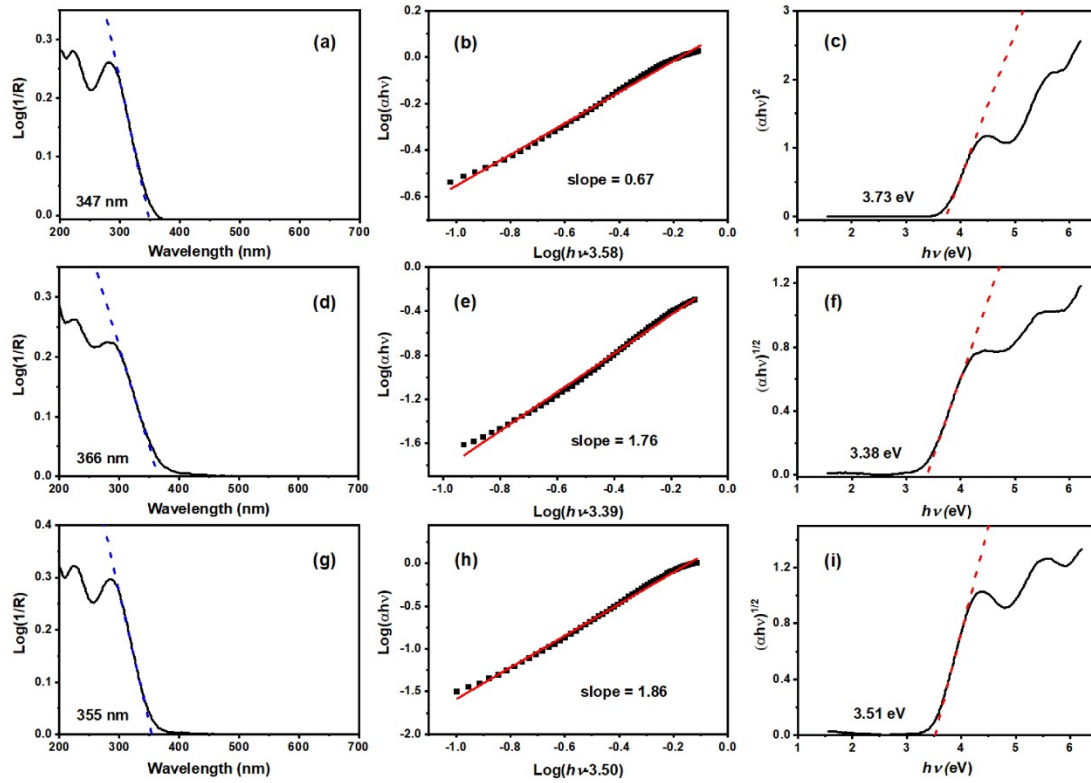

**Fig. S2** Determination for the band gaps of (a) SC<sub>2.5</sub>MPO, (b) SB<sub>2.5</sub>MPO and (c) SMPO. The

bandgap can be calculated with the equation:  $\alpha hv = A(hv - E_g)^{n/2}$  [1]. This equation can be

derived as:  $\text{Log}(\alpha hv) = (n/2) \times \text{Log}(hv - E_g) + \text{Log}A$ .  $n = 1$  and  $4$  indicates direct bandgap

and indirect bandgap, respectively. DRS are transformed to similar forms to absorption

spectra.  $E_g$  is estimated approximately to be 3.58 eV, 3.39 eV and 3.50 eV for SC<sub>2.5</sub>MPO,

SB<sub>2.5</sub>MPO and SMPO, respectively, as shown in Fig. S2a, S2d and S2g. Then,  $\text{Log}(\alpha h\nu)$  vs.  $\text{Log}(h\nu - E_g)$  plots are fitted with liner equation to determine the value of  $n$ . As shown in Fig. S2b, S2e and S2h,  $n$  is calculated to be 1 for SC<sub>2.5</sub>MPO, and 4 for SB<sub>2.5</sub>MPO and SMPO. Therefore, SC<sub>2.5</sub>MPO has direct bandgap, and SB<sub>2.5</sub>MPO and SMPO have indirect bandgaps. Hence,  $(\alpha h\nu)^2$  vs.  $h\nu$  is plotted in Fig. S2c; while  $(\alpha h\nu)^{1/2}$  vs.  $h\nu$  are plotted in Fig. S2f and Fig. S2i. The bandgaps are determined by the straight line to  $h\nu$  axis: 3.73 eV, 3.38 eV and 3.51 eV for SC<sub>2.5</sub>MPO, SB<sub>2.5</sub>MPO and SMPO, respectively.

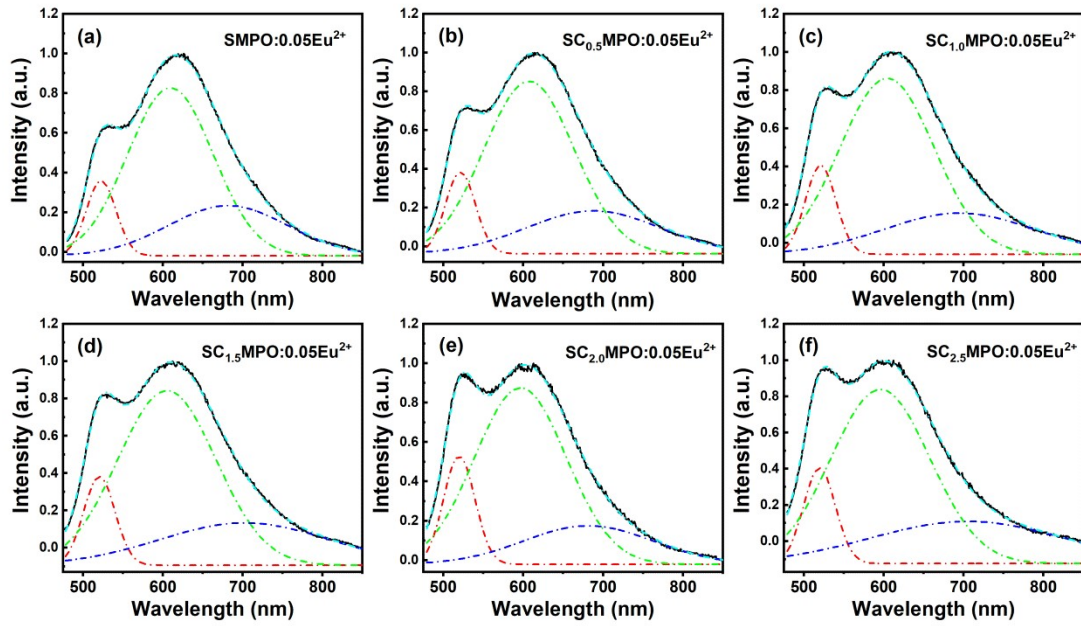

**Fig. S3** (a–f) PL spectra and Gaussian fitted curves of SC<sub>*x*</sub>MPO:Eu<sup>2+</sup> (*x* = 0–2.5) excited at 460 nm

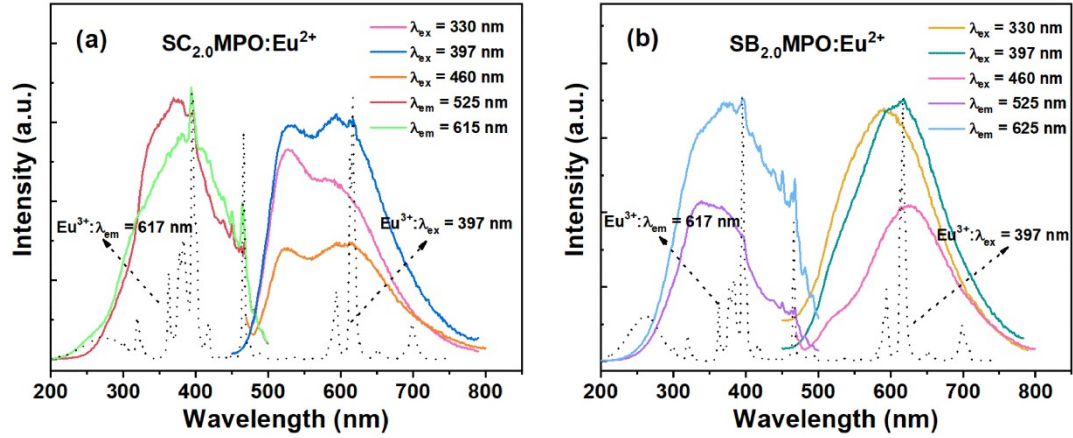

**Fig. S4** (a) PLE and PL spectra of SC<sub>2.0</sub>MPO:Eu<sup>2+</sup> (solid lines) and normalized SC<sub>2.0</sub>MPO:Eu<sup>3+</sup> (dotted lines); (b) PLE and PL spectra of SB<sub>2.0</sub>MPO:Eu<sup>2+</sup> (solid lines) and normalized SB<sub>2.0</sub>MPO:Eu<sup>3+</sup> (dotted lines)

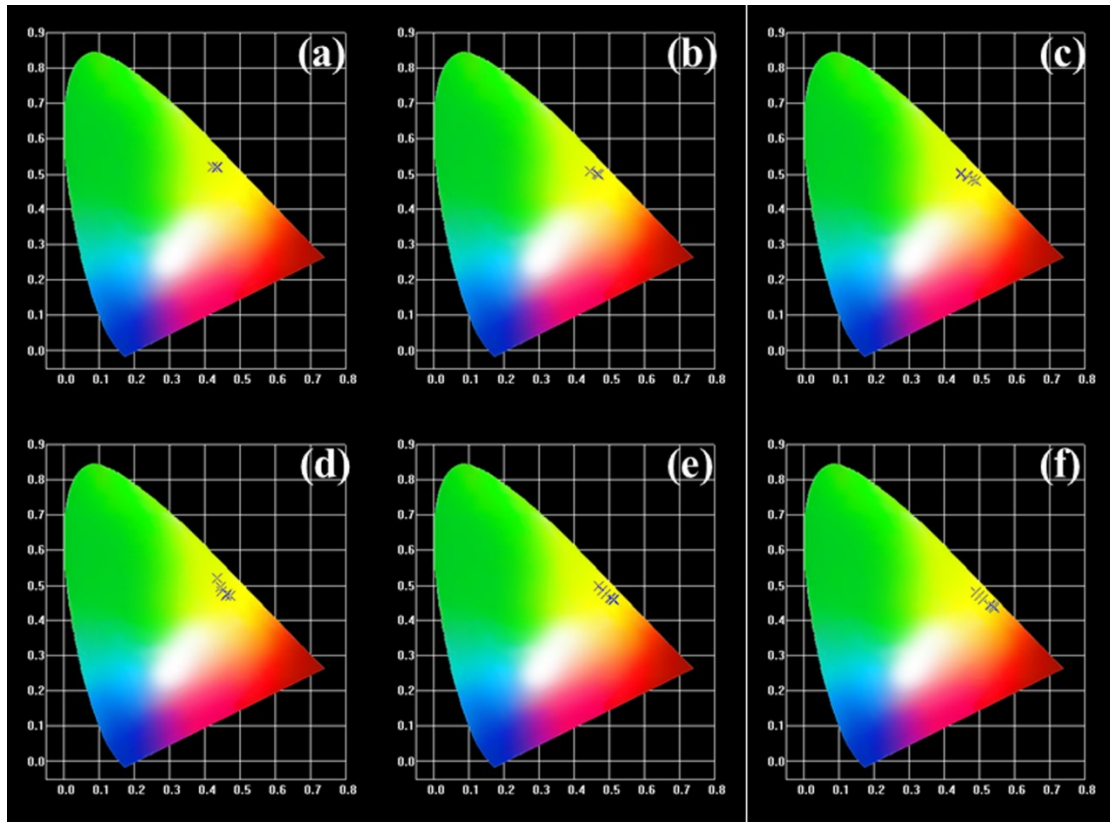

**Fig. S5** CIE chromaticity diagram of SC<sub>x</sub>MPO:Eu<sup>2+</sup> ( $x = 0-2.5$ ) under the excitation of (a) 330 nm, (b) 397 nm and (c) 400 nm; CIE chromaticity diagram of SB<sub>y</sub>MPO:Eu<sup>2+</sup> ( $y = 0-3.0$ ) under the excitation of (d) 330 nm, (e) 397 nm and (f) 400 nm.

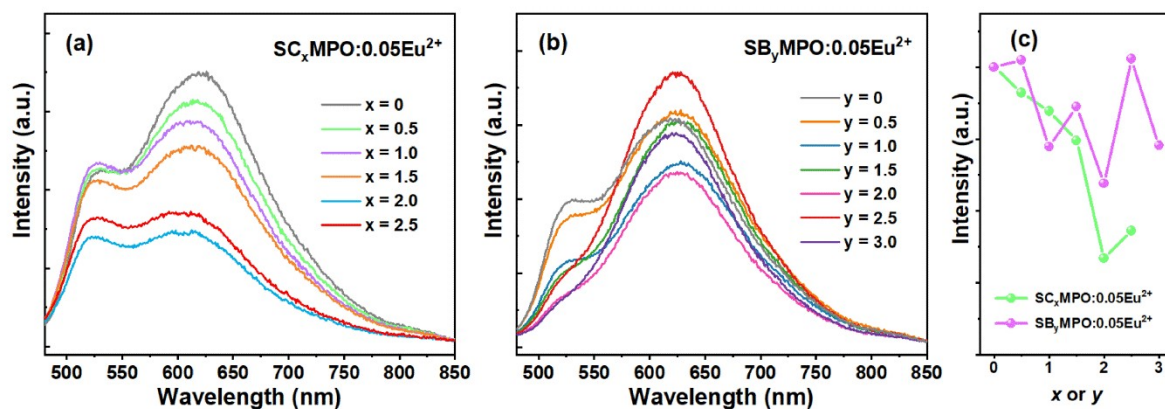

**Fig. S6** PL spectra of (a)  $SC_xMPO:Eu^{2+}$  ( $x = 0-2.5$ ) and (b)  $SB_yMPO:Eu^{2+}$  ( $y = 0-3.0$ ); (c) PL intensity of  $SC_xMPO:Eu^{2+}$  and  $SB_yMPO:Eu^{2+}$  ( $\lambda_{ex} = 460$  nm)

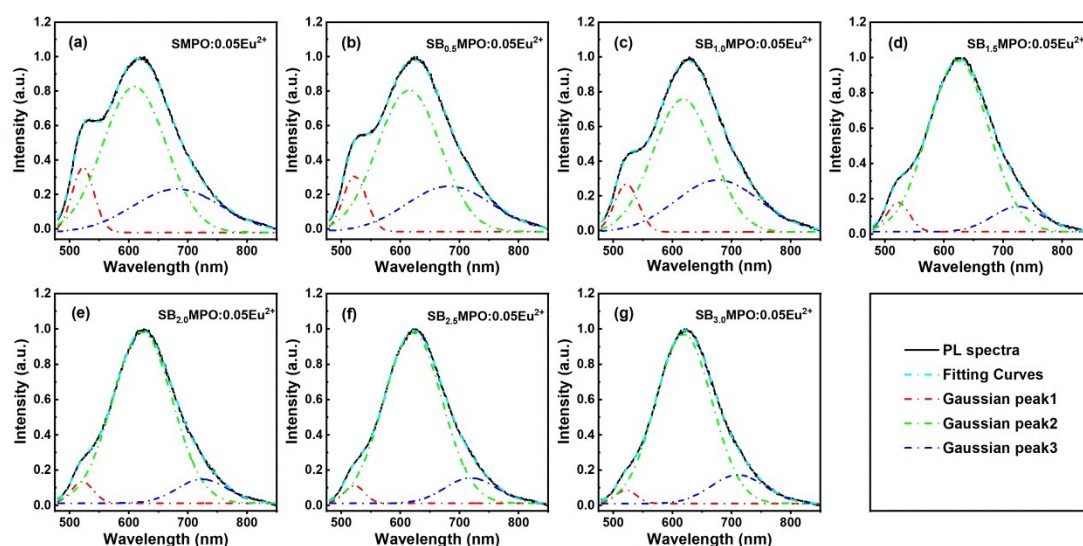

**Fig. S7** (a-g) PL spectra and Gaussian fitted curves of  $SB_yMPO:Eu^{2+}$  ( $y = 0-3.0$ ) excited at 460 nm

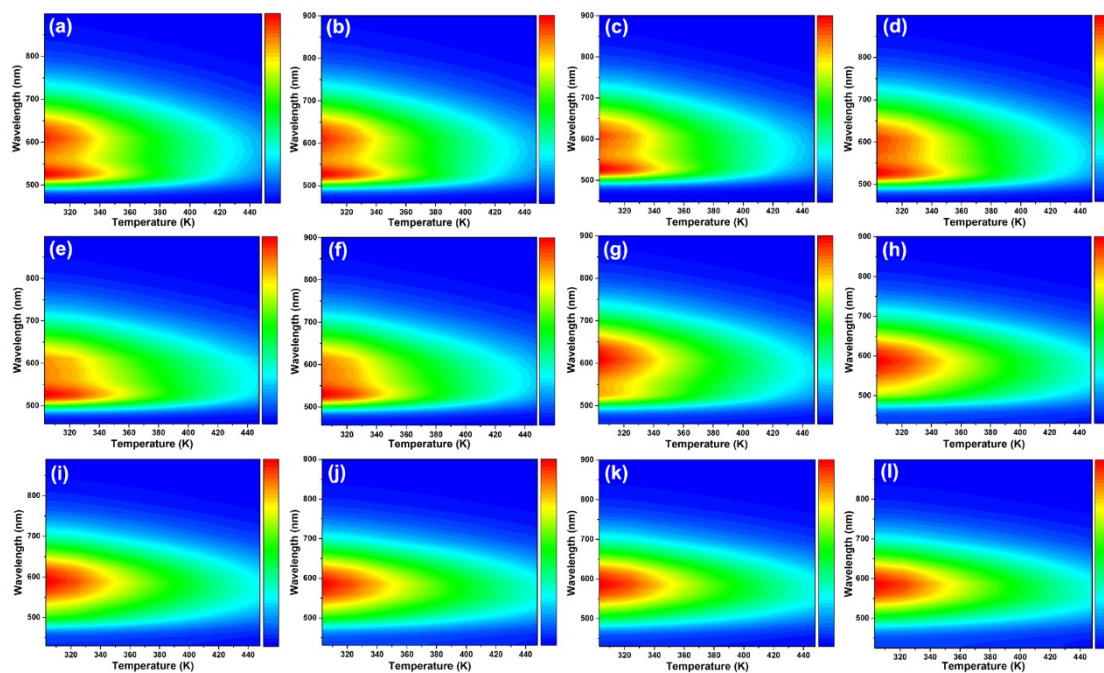

**Fig. S8** PL spectra of (a–f)  $\text{SC}_x\text{MPO}:\text{Eu}^{2+}$  ( $x = 0\text{--}2.5$ ) and (g–l)  $\text{SB}_y\text{MPO}:\text{Eu}^{2+}$  ( $y = 0.5\text{--}3.0$ ) with various temperatures ( $T = 300\text{--}448$  K)

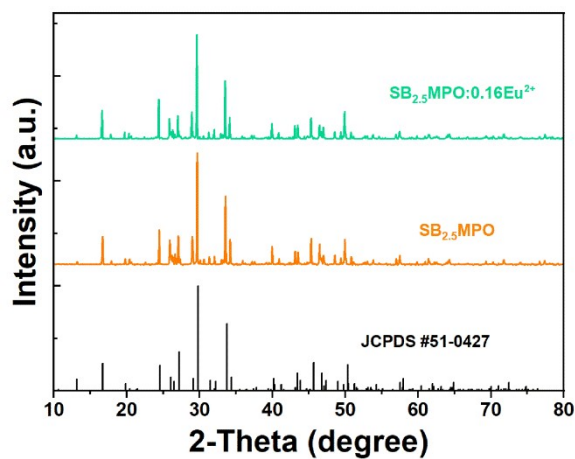

**Fig. S9** XRD patterns of  $\text{SB}_{2.5}\text{MPO}:z\text{Eu}^{2+}$  ( $z = 0$  and  $0.16$ ) with the standard data  $\text{Sr}_9\text{Fe}_{1.5}(\text{PO}_4)_7$

**Table S1** Ionic radii (Å) of Sr<sup>2+</sup>, Ca<sup>2+</sup>, Ba<sup>2+</sup>, Fe<sup>2+</sup>, Mg<sup>2+</sup> and Eu<sup>2+</sup> under different CNs and D<sub>r</sub> values

|                        | CN = 6 | CN = 7 | CN = 8 | CN = 9 |
|------------------------|--------|--------|--------|--------|
| Sr <sup>2+</sup>       | 1.18   | 1.21   | 1.26   | 1.31   |
| Ca <sup>2+</sup>       | 1.0    | 1.06   | 1.12   | 1.18   |
| Ba <sup>2+</sup>       | 1.35   | 1.38   | 1.42   | 1.47   |
| Fe <sup>2+</sup>       | 0.78   | --     | 0.92   | --     |
| Mg <sup>2+</sup>       | 0.72   | --     | 0.89   | --     |
| Eu <sup>2+</sup>       | 1.17   | 1.20   | 1.25   | 1.30   |
| D <sub>r</sub> (Mg-Fe) | 7.7%   | --     | 3.3%   | --     |
| D <sub>r</sub> (Ca-Sr) | 15.3%  | 12.4%  | 11.1%  | 9.9%   |
| D <sub>r</sub> (Ba-Sr) | -14.4% | -14.1% | -12.7% | -12.2% |
| D <sub>r</sub> (Eu-Sr) | 0.85%  | 0.83%  | 0.79%  | 0.76%  |

**Table S2** CIE coordinates of SC<sub>x</sub>MPO:Eu<sup>2+</sup> (x = 0–2.5) and SB<sub>y</sub>MPO:Eu<sup>2+</sup> (y = 0.5–3.0) under different excitation wavelengths

| CIE coordinates<br>(x, y)              | λ <sub>ex</sub> = 330 nm | λ <sub>ex</sub> = 397 nm | λ <sub>ex</sub> = 400 nm | λ <sub>ex</sub> = 460 nm |
|----------------------------------------|--------------------------|--------------------------|--------------------------|--------------------------|
| SMPO:Eu <sup>2+</sup>                  | (0.434, 0.520)           | (0.465, 0.500)           | (0.469, 0.497)           | (0.491, 0.479)           |
| SC <sub>0.5</sub> MPO:Eu <sup>2+</sup> | (0.433, 0.521)           | (0.460, 0.503)           | (0.464, 0.500)           | (0.479, 0.486)           |
| SC <sub>1.0</sub> MPO:Eu <sup>2+</sup> | (0.432, 0.521)           | (0.455, 0.505)           | (0.458, 0.503)           | (0.468, 0.493)           |
| SC <sub>1.5</sub> MPO:Eu <sup>2+</sup> | (0.434, 0.517)           | (0.454, 0.504)           | (0.457, 0.502)           | (0.466, 0.494)           |

|                                        |                |                |                |                |
|----------------------------------------|----------------|----------------|----------------|----------------|
| SC <sub>2.0</sub> MPO:Eu <sup>2+</sup> | (0.422, 0.520) | (0.446, 0.506) | (0.445, 0.507) | (0.447, 0.500) |
| SC <sub>2.5</sub> MPO:Eu <sup>2+</sup> | (0.423, 0.519) | (0.441, 0.509) | (0.444, 0.507) | (0.447, 0.502) |
| SB <sub>0.5</sub> MPO:Eu <sup>2+</sup> | (0.444, 0.495) | (0.477, 0.487) | (0.481, 0.485) | (0.501, 0.470) |
| SB <sub>1.0</sub> MPO:Eu <sup>2+</sup> | (0.448, 0.482) | (0.485, 0.476) | (0.489, 0.475) | (0.510, 0.459) |
| SB <sub>1.5</sub> MPO:Eu <sup>2+</sup> | (0.463, 0.474) | (0.499, 0.467) | (0.503, 0.466) | (0.529, 0.446) |
| SB <sub>2.0</sub> MPO:Eu <sup>2+</sup> | (0.459, 0.471) | (0.501, 0.464) | (0.504, 0.463) | (0.532, 0.442) |
| SB <sub>2.5</sub> MPO:Eu <sup>2+</sup> | (0.472, 0.469) | (0.509, 0.462) | (0.512, 0.460) | (0.540, 0.440) |
| SB <sub>3.0</sub> MPO:Eu <sup>2+</sup> | (0.466, 0.467) | (0.508, 0.459) | (0.512, 0.458) | (0.543, 0.436) |

**Table S3** Parameters of the fabricated LED devices

|     | Device 1 | Device 3 |
|-----|----------|----------|
| R1  | 80.86    | 96.11    |
| R2  | 88.42    | 90.23    |
| R3  | 95.04    | 83.60    |
| R4  | 74.34    | 79.90    |
| R5  | 78.44    | 91.27    |
| R6  | 86.21    | 87.63    |
| R7  | 85.67    | 80.80    |
| R8  | 68.68    | 83.97    |
| R9  | 23.66    | 90.21    |
| R10 | 74.57    | 78.91    |
| R11 | 72.26    | 85.63    |



|     |       |       |
|-----|-------|-------|
| R12 | 60.88 | 73.97 |
| R13 | 82.03 | 93.97 |
| R14 | 97.20 | 90.94 |
| R15 | 72.17 | 90.96 |

---

\*Note: The luminous efficiency of Device 3 is 40.61 lm/W.

## Reference

1. L. Zhang, D. Wang, Z. Hao, X. Zhang, G.-h. Pan, H. Wu and J. Zhang, *Adv. Opt. Mater.*, 2019, 7, 1900185.
